# Supplementary material
Source: publisher site journal article supplement (https://www.spandidos-publications.com/1660/downloadSupplementary)

Figure S1. Representative flow cytometry plots indicating ROS generation in CEM-C7-14 (left panel), CEM-C1-15 (middle panel) and MOLT4 (right panel) in leukaemia cells treated with Dex, CLQ, TG or ROT alone or in combination with Dex as indicated. The presented plots are one representative experiment out of at least three repeats for each cell line. Dex, dexamethasone; CLQ, chloroquine; TG, thapsigargin; ROT, rotenone; ROS, reactive oxygen species.

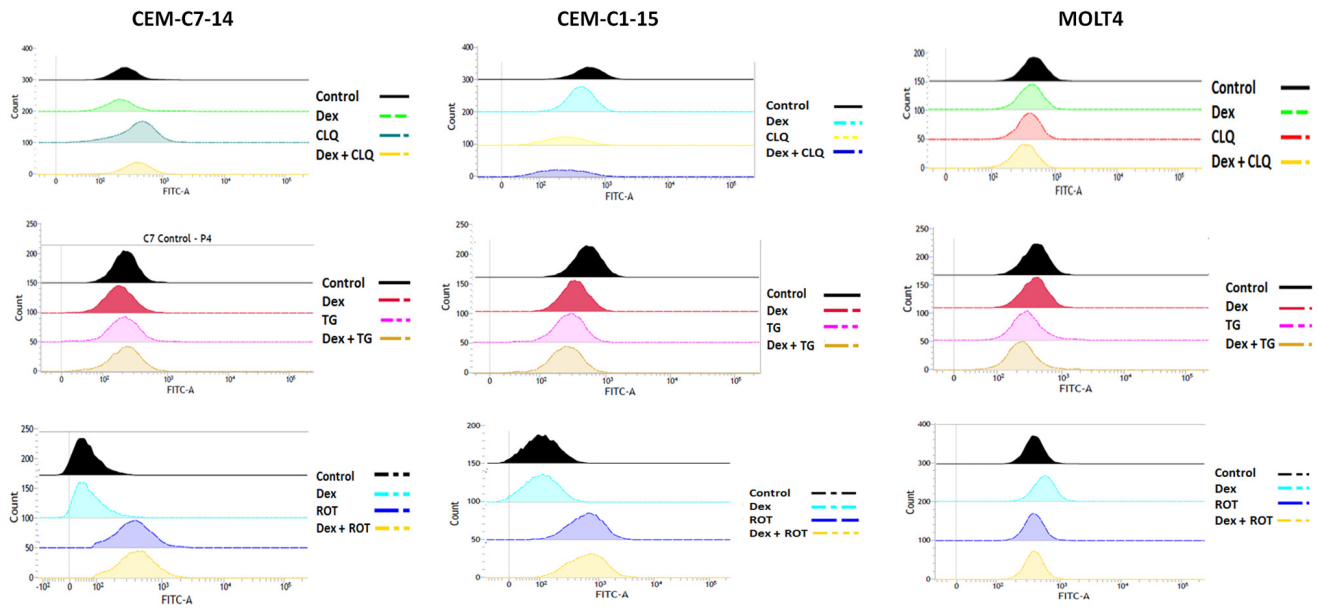

Figure S2. Representative NucleoCounter NC-3000 histograms of the intensity of JC-1 (%) in (A) CEM-C7-14, (B) CEM-C1-15 and (C) MOLT4 leukaemia cells treated with Dex, CLQ, TG or ROT alone or in combination with Dex as indicated. The presented plots are one representative experiment out of at least three repeats for each cell line. Dex, dexamethasone; CLQ, chloroquine; TG, thapsigargin; ROT, rotenone.

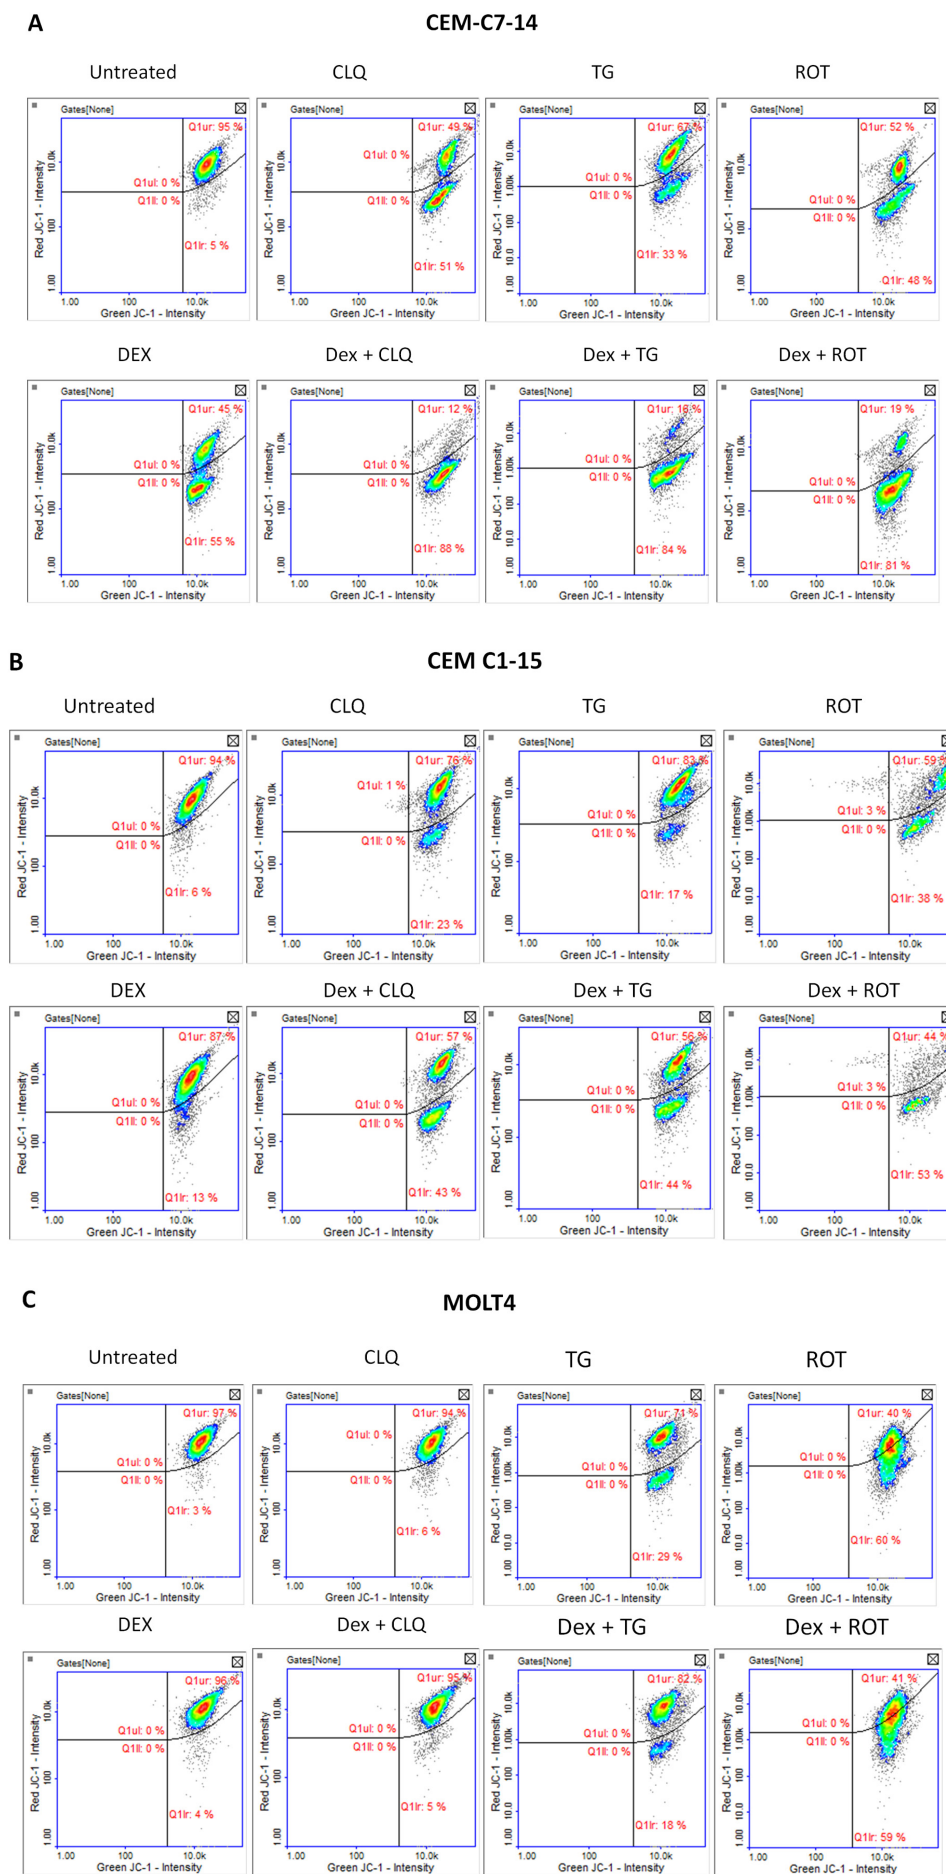

Figure S3. Representative western blots of GRP94, GRP78, beclin-1 and LC3-II/LC3-I protein levels in ALL cells treated with Dex and (A) CLQ, (B) TG and (C) ROT. ALL, acute lymphoblastic leukaemia; Dex, dexamethasone; CLQ, chloroquine; TG, thapsigargin; ROT, rotenone; LC3, microtubule-associated protein 1 light chain 3 $\alpha$ ; GRP, glucose-regulated protein.

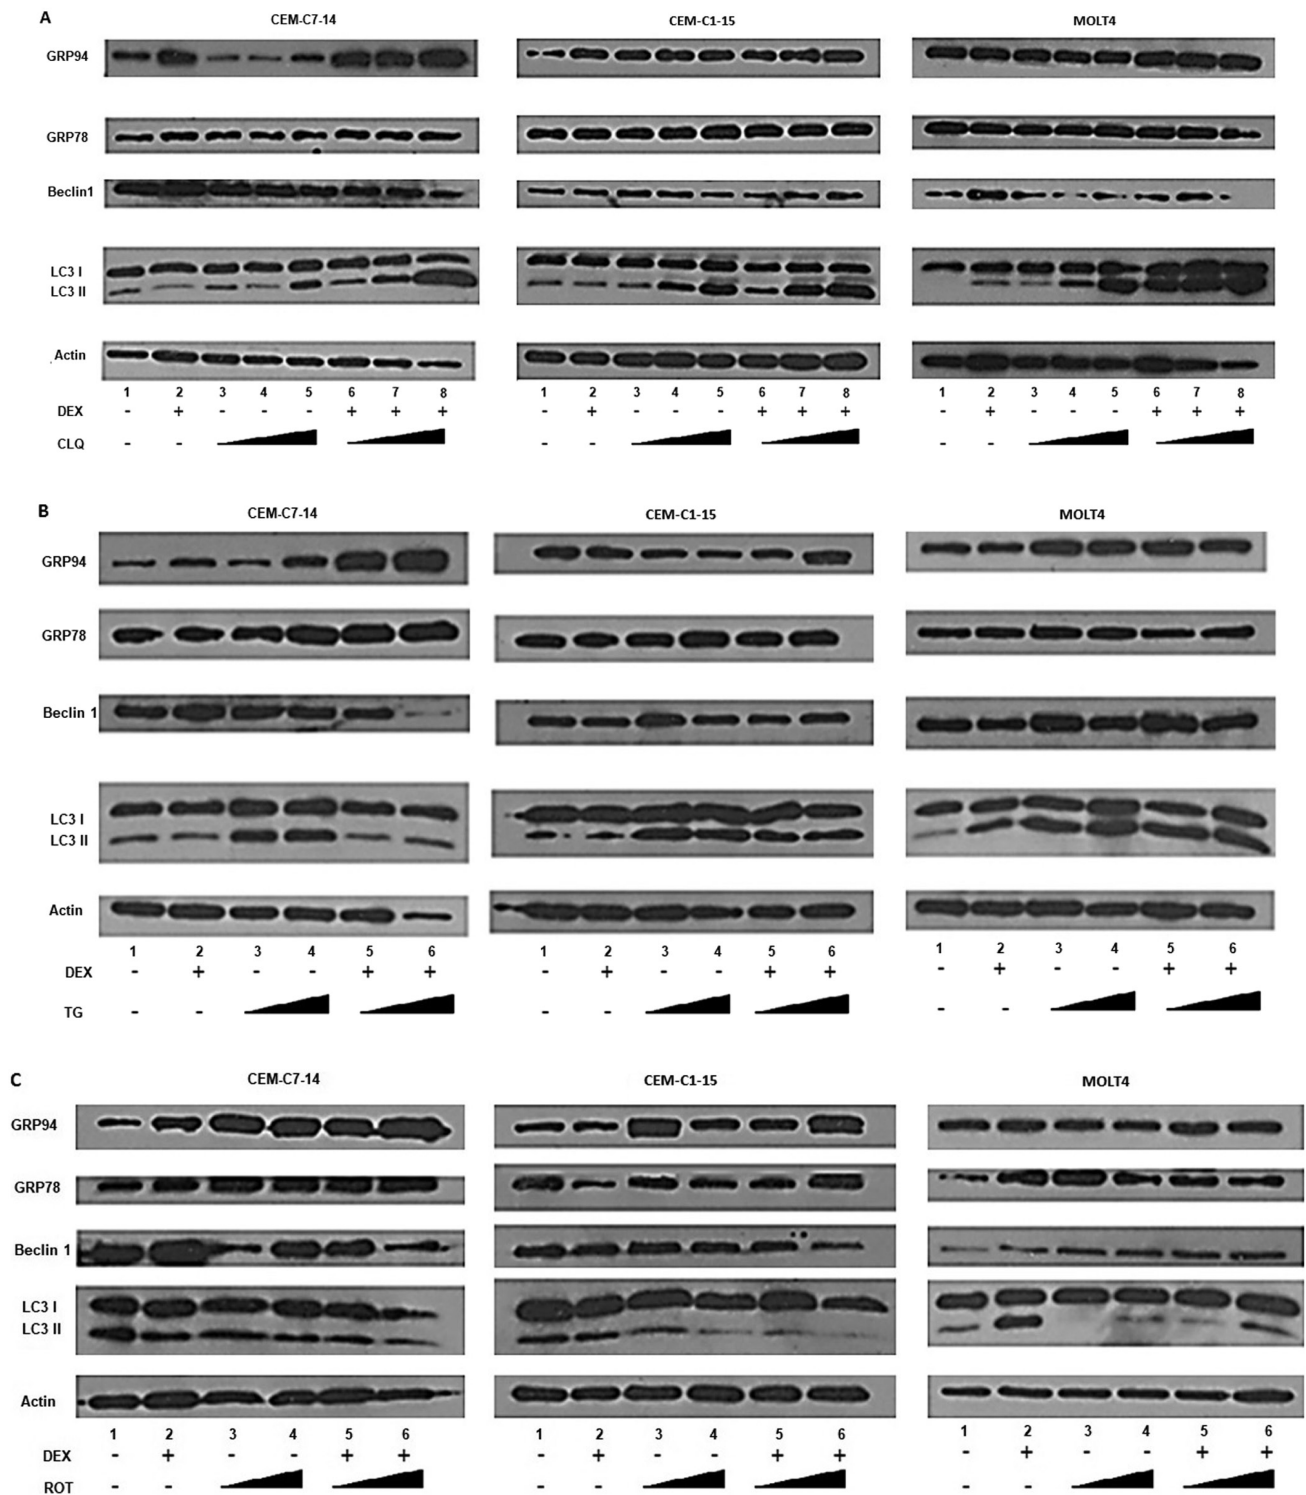

Figure S4. mRNA levels of (A) GRP94 and (B) GRP78 in ALL cells following 24-h incubation with 1  $\mu$ M Dex. The results are representative of three independent experiments. The values were normalized to the corresponding RPL19 internal control. Data are presented as the mean  $\pm$  SEM. \*\*\*P<0.001 vs. untreated control. ALL, acute lymphoblastic leukaemia; Dex, dexamethasone; GRP, glucose-regulated protein.

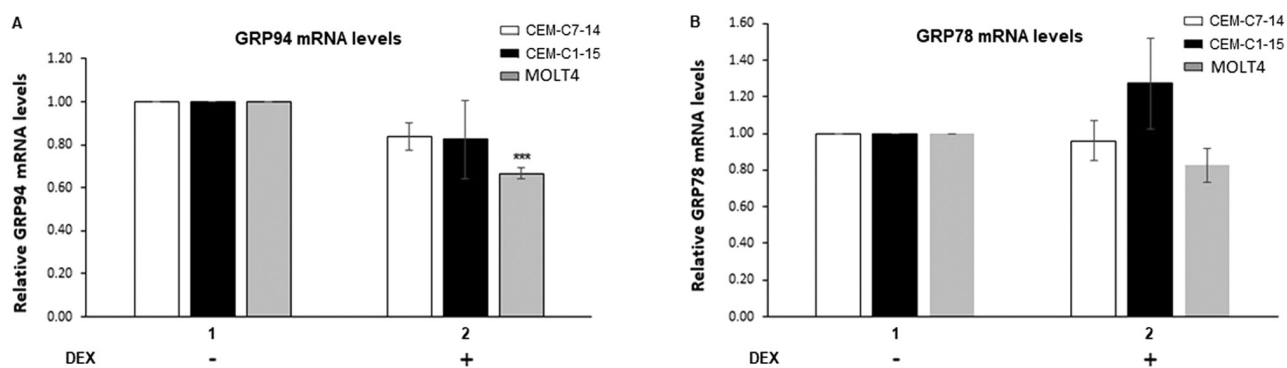

Figure S5. Representative flow cytometry plots showing surface GRP94 protein levels in (A) CEM-C7-14, (B) CEM-C1-15 and (C) MOLT4 leukaemia cells treated with Dex, CLQ, TG or ROT alone or in combination with Dex as indicated. The presented plots are one representative experiment out of at least three repeats for each cell line. Dex, dexamethasone; CLQ, chloroquine; TG, thapsigargin; ROT, rotenone; GRP, glucose-regulated protein.

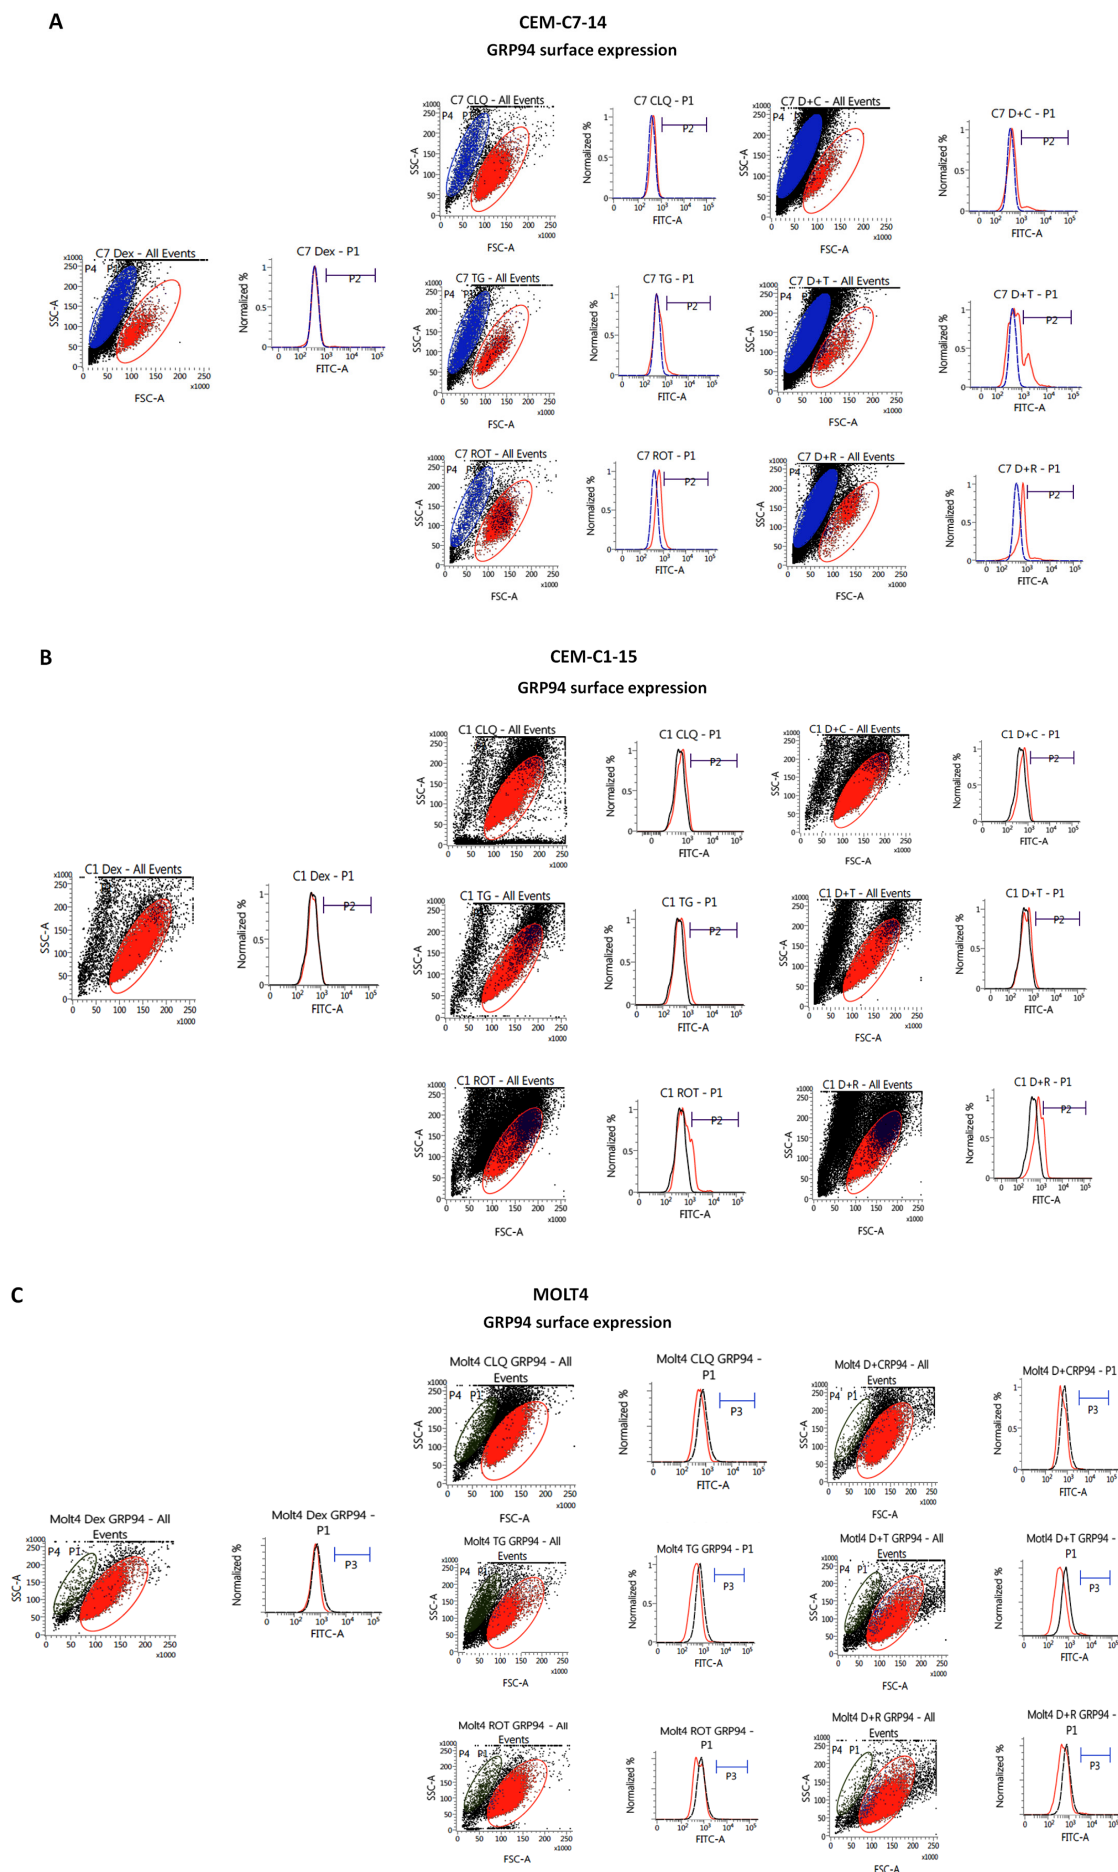

Supplement: Supplementary file 1 [file downloadSupplementary]
